# Supplementary material
Source: PubMed Central journal article supplement (PMC9662320)
Supplement: NIHMS1846822-supplement-Supplement.pdf [file NIHMS1846822-supplement-Supplement.pdf]

Surface modification of nanoparticles enhances drug delivery to the brain and improves survival in a glioblastoma multiforme murine model.

**Kanawat Wiwatchaitawee<sup>1,\*</sup>, Kareem Ebeid<sup>1,2,3,\*</sup>, Juliana C. Quarterman<sup>1</sup>, Youssef Naguib<sup>1,2,3</sup>, MD Yousuf Ali<sup>4,5,6</sup>, Claudia Oliva<sup>5,6</sup>, Corinne Griguer<sup>5,6</sup>, Aliasger K. Salem<sup>1,7</sup>**

<sup>1</sup> *Department of Pharmaceutical Sciences and Experimental Therapeutics, College of Pharmacy, University of Iowa, Iowa City, IA 52242, USA*

<sup>2</sup> *Department of Pharmaceutics, Faculty of Pharmacy, Minia University, Minia, Minia 61519, Egypt*

<sup>3</sup> *Department of Pharmaceutics, Faculty of Pharmacy and Pharmaceutical Manufacturing, Deraya University, New Minia City, Minia 61768, Egypt*

<sup>4</sup> *Interdisciplinary Graduate Program in Human Toxicology, University of Iowa, Iowa City, IA 52242, USA*

<sup>5</sup> *Free Radical & Radiation Biology Program, Department of Radiation Oncology, Holden Comprehensive Cancer Center, University of Iowa, Iowa City, IA 52242, USA*

<sup>6</sup> *Department of Radiation Oncology, University of Iowa Hospitals and Clinics, Iowa City, IA 52242, USA*

<sup>7</sup> *Holden Comprehensive Cancer Center, University of Iowa, Iowa City, IA 52242, USA.*

## Supporting information

### Synthesis of PLGA-b-PEG-COOH copolymers

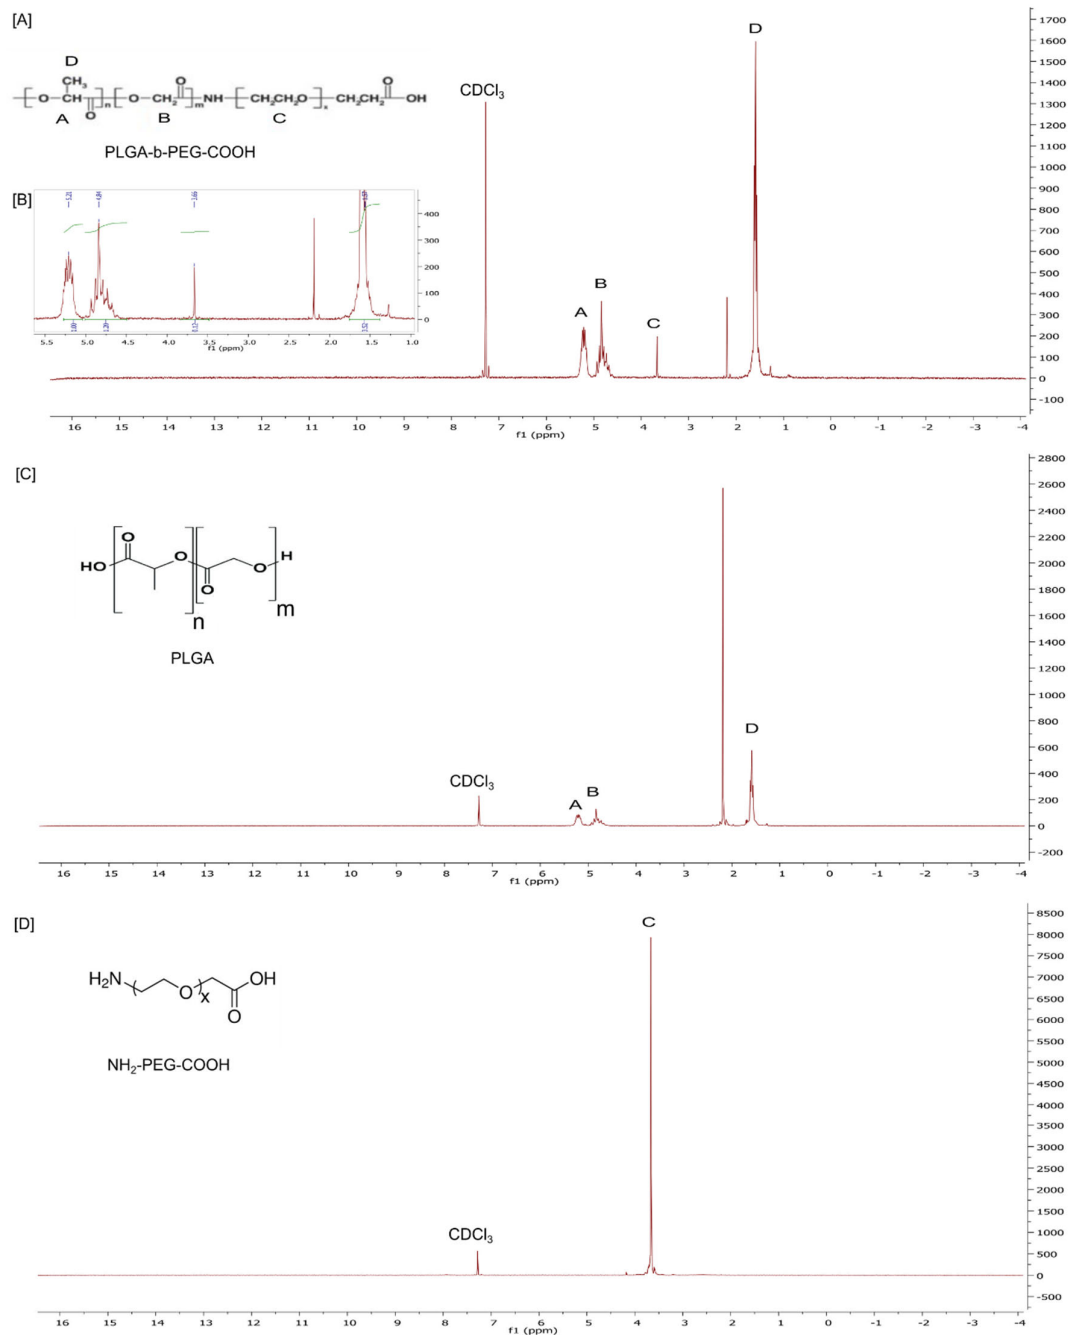

**Figure S1.** PLGA-b-PEG-COOH copolymers were successfully synthesized and characterized using CDCl<sub>3</sub> as a solvent and <sup>1</sup>H NMR spectrometry. (A) The peaks appeared at δ 1.56 ppm, δ 3.66 ppm, δ 4.81 ppm and δ 5.21 ppm which corresponded with the <sup>1</sup>H NMR spectrum of (C) PLGA (at δ 1.63 ppm, δ 4.83 ppm and δ 5.18 ppm) and the <sup>1</sup>H NMR spectrum of (D) NH<sub>2</sub>-PEG-COOH (at δ 3.67 ppm). Integral ratios between PLGA (-CHCH<sub>3</sub>-)(-O-CH2-) and PEG (-CH<sub>2</sub>CH2O-) peaks (B) are shown in the figure.

**Table S1.** Physicochemical characterization of NP formulations.

| <b>Samples</b>     | <b>Particle size (nm ± S.D.)</b> | <b>PDI ± S.D.</b> | <b>Zeta potential (mV ± S.D.)</b> | <b>Loading (µg/1mg particles)</b> | <b>% Encapsulation</b> |
|--------------------|----------------------------------|-------------------|-----------------------------------|-----------------------------------|------------------------|
| PGM NPs            | 177.1 ± 2.9                      | 0.086 ± 0.011     | 28.4 ± 10.4                       | -                                 | -                      |
| DiR-PG NPs         | 149.4 ± 6.0                      | 0.083 ± 0.008     | (-) 39.0 ± 1.8                    | 1.66 ± 0.34                       | 49.86 ± 10.20          |
| DiR-PGM NPs        | 173.1 ± 5.6                      | 0.069 ± 0.005     | 31.2 ± 9.5                        | 1.63 ± 0.12                       | 49.03 ± 3.55           |
| DiR-PGI NPs        | 161.9 ± 23.9                     | 0.086 ± 0.014     | 37.5 ± 5.4                        | 1.42 ± 0.09                       | 42.65 ± 2.69           |
| Coumarin-6-PG NPs  | 135.6 ± 0.7                      | 0.120 ± 0.019     | (-) 20.7 ± 1.5                    | 1.29 ± 0.02                       | 35.42 ± 6.12           |
| Coumarin-6-PGM NPs | 159.1 ± 1.2                      | 0.102 ± 0.008     | 11.7 ± 0.1                        | 0.78 ± 0.08                       | 23.30 ± 2.62           |
| Coumarin-6-PGI NPs | 172.0 ± 2.7                      | 0.043 ± 0.038     | 13.2 ± 0.2                        | 0.82 ± 0.10                       | 24.69 ± 2.97           |

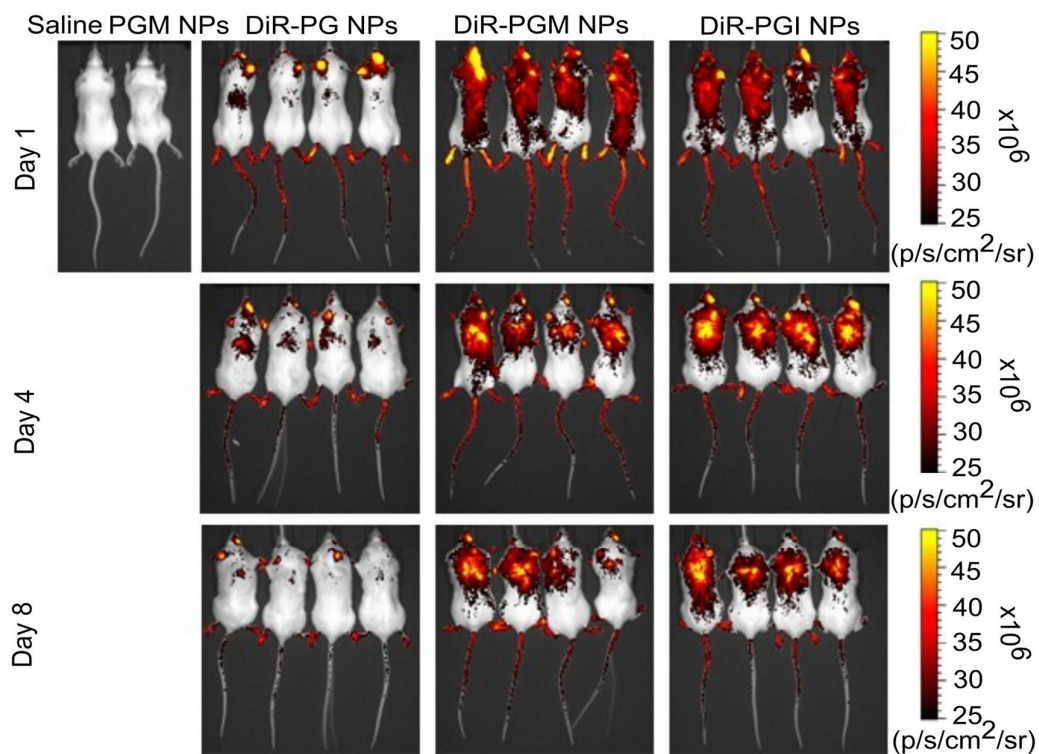

**Figure S2.** Fluorescence intensity of mice injected IV with either saline, blank PGM, DiR-PG, DiR-PGM or DiR-PGI NPs. The mice were injected with 5 mg of DiR-loaded NP formulations equal to 8.5  $\mu\text{g}$  of DiR or 5 mg of blank PGM NPs by retro-orbital injection to observe biodistribution. On days 1, 4, and 8 after injection, the mice were anesthetized and whole body fluorescence was measured using an IVIS-200 after ( $n = 4/\text{group}$ ).

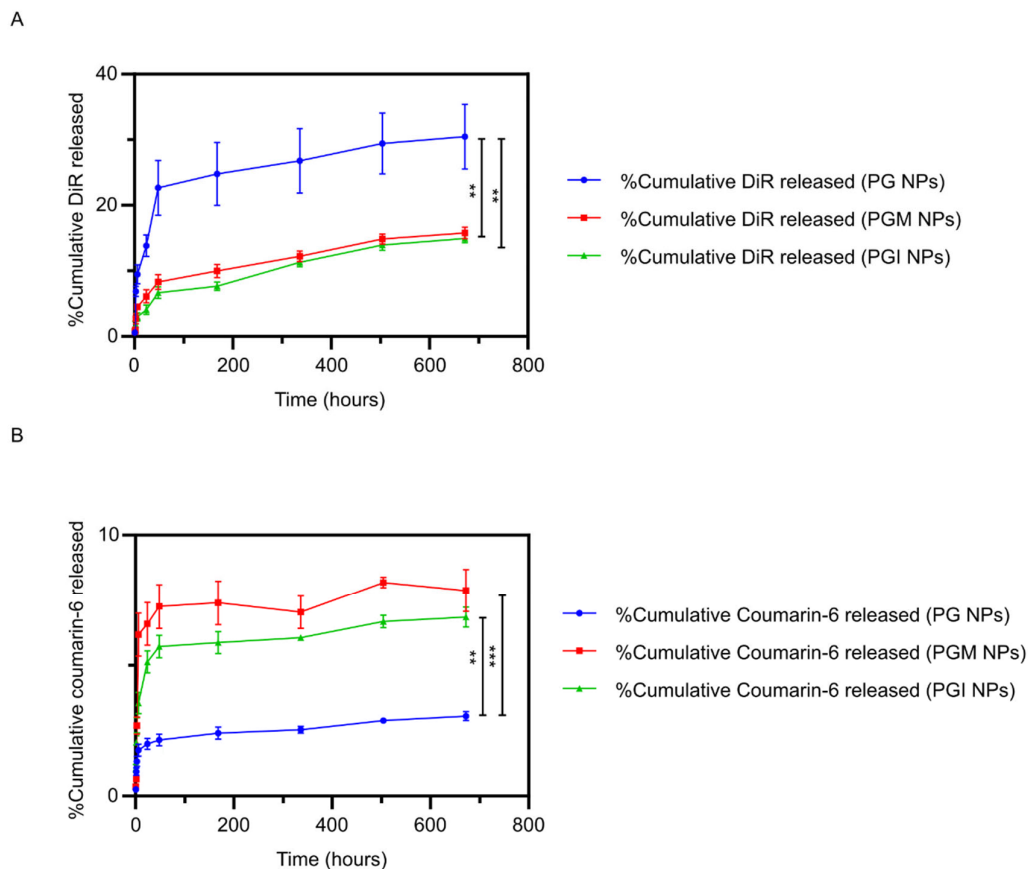

**Figure S3.** In vitro release profile of DiR from NP formulations over 672 hours reported as mean  $\pm$  S.D. (n = 3) (A). In vitro release profile of coumarin-6 from NP formulations over 672 hours reported as mean  $\pm$  S.D. (n = 3) (B). Results were analyzed using repeated measures ANOVA (Tukey's post-hoc test); \*\* p < 0.01 and \*\*\* p < 0.001.

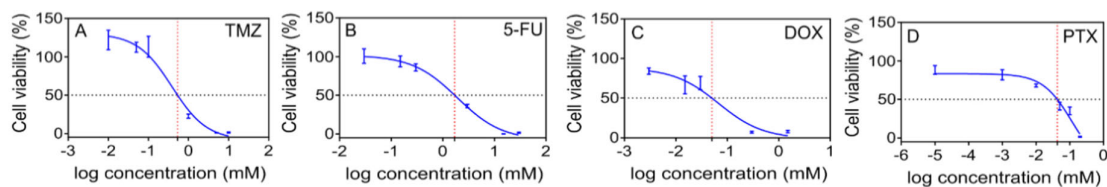

**Figure S4.** In vitro cytotoxicity results from MTS assays performed using U87MG-Red-Fluc cells incubated with (a) TMZ, (b) 5-FU, (c) DOX, or (d) PTX solutions at various concentrations for 24 h. The media alone and untreated cells were used as negative controls. Results are reported as mean  $\pm$  S.D. (n = 3/group).
